# Supplementary figures and images for: A molecular basis for spine color morphs in the sea urchin Lytechinus variegatus
Source: PubMed Central journal article supplement — Sci Rep. 2024 Nov 18;14:28518. doi: 10.1038/s41598-024-79312-3 (PMC11574130; doi:10.1038/s41598-024-79312-3), 2024-11-18

Wise et al.,  
Supplemental Figure 1

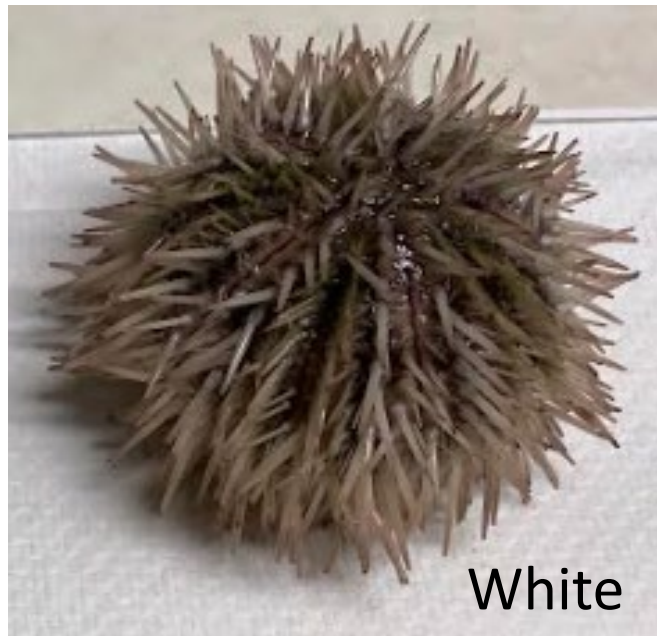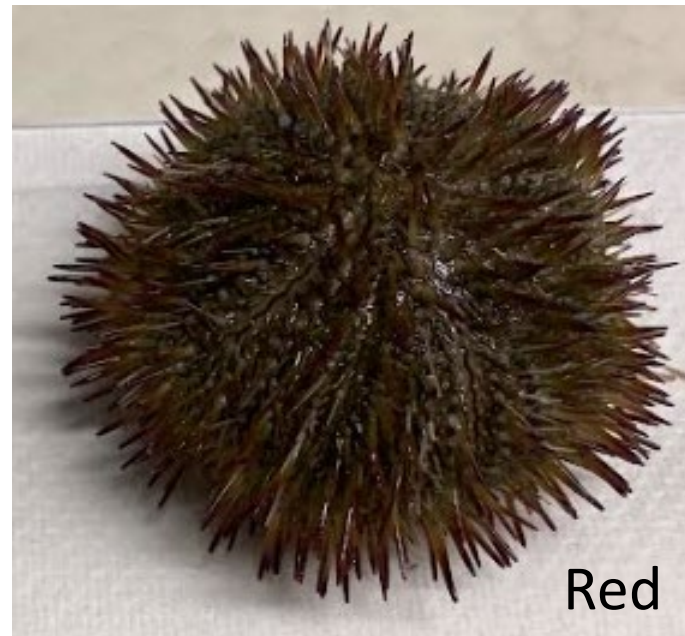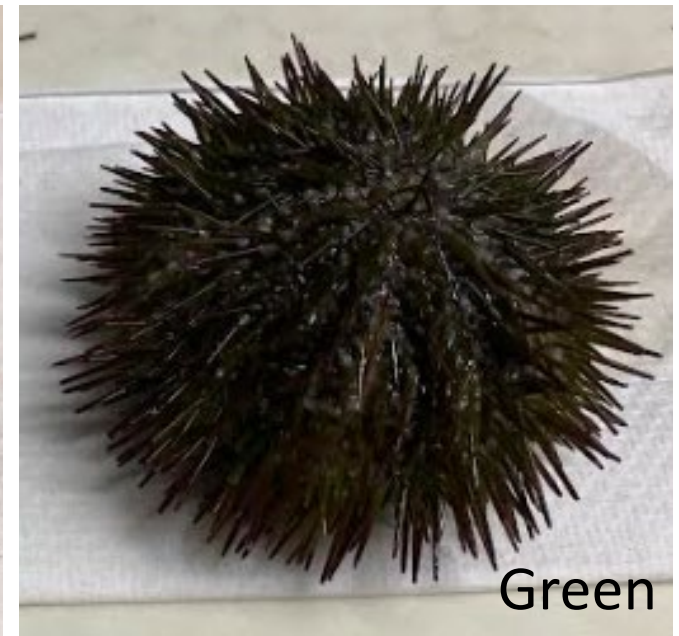

Wise et al.,  
Supplemental Figure 2

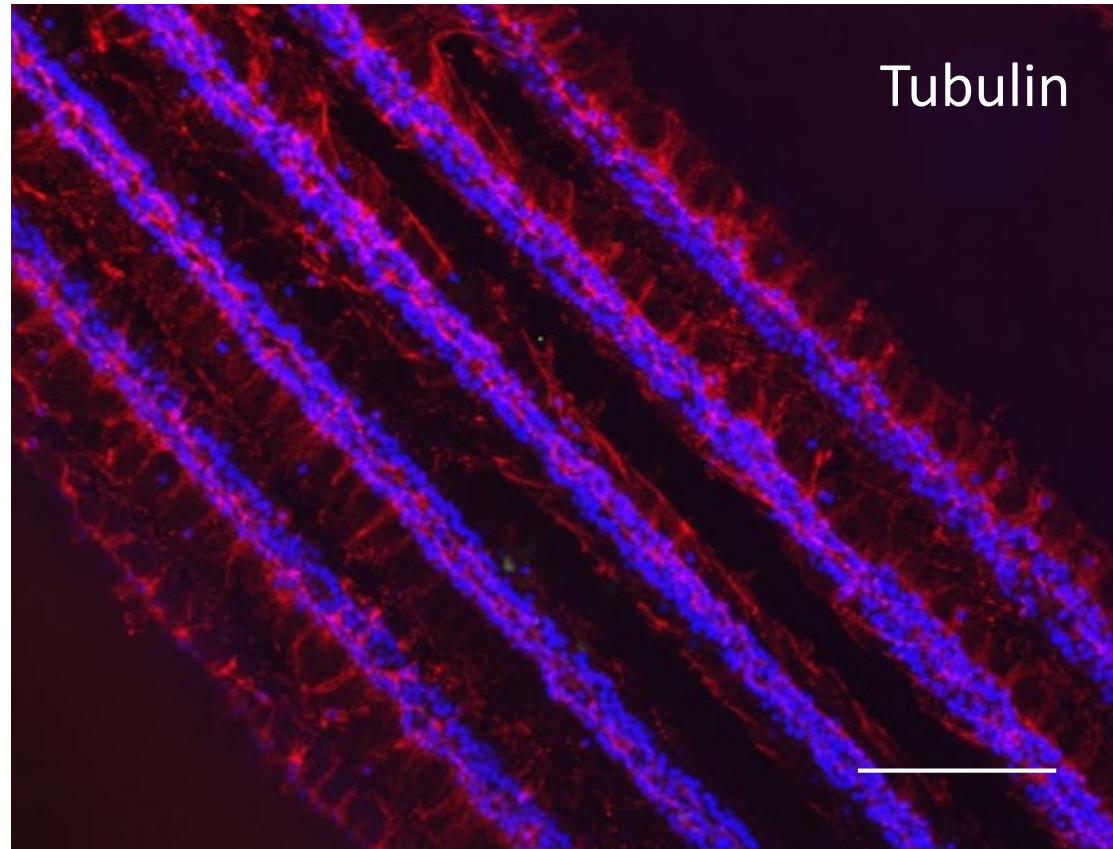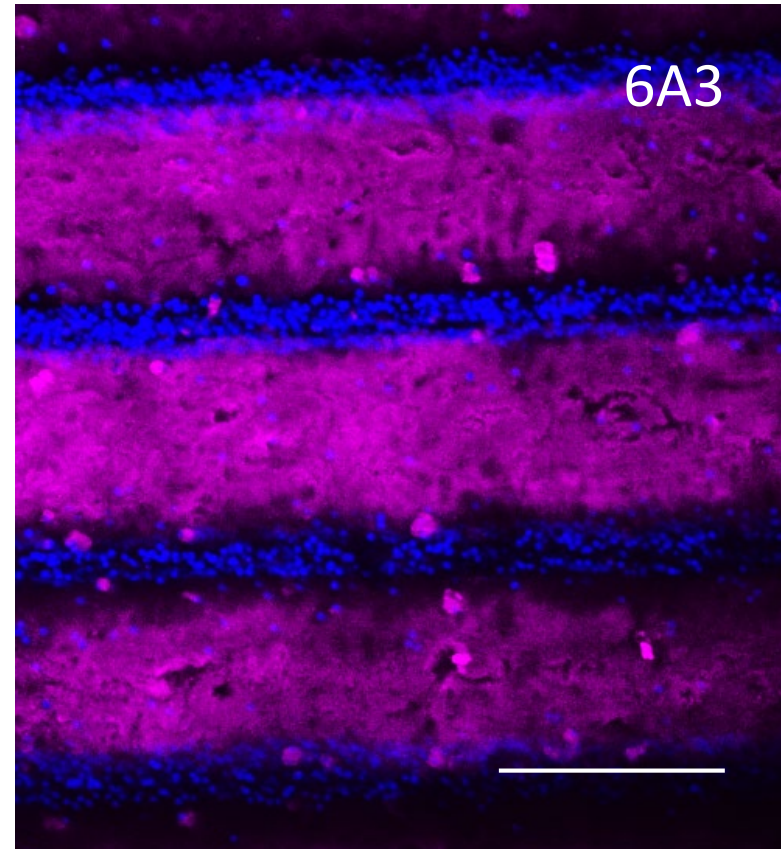



Wise et al.,  
Supplemental Figure 3

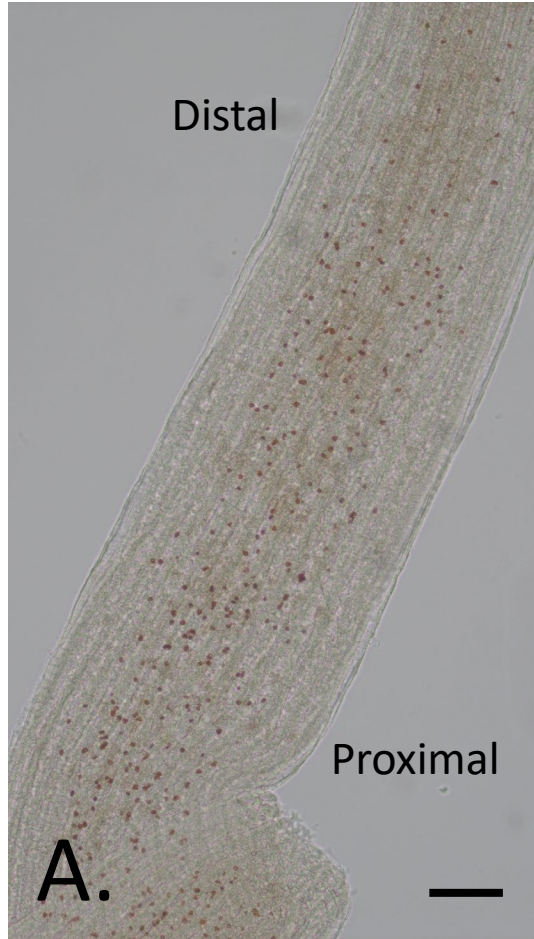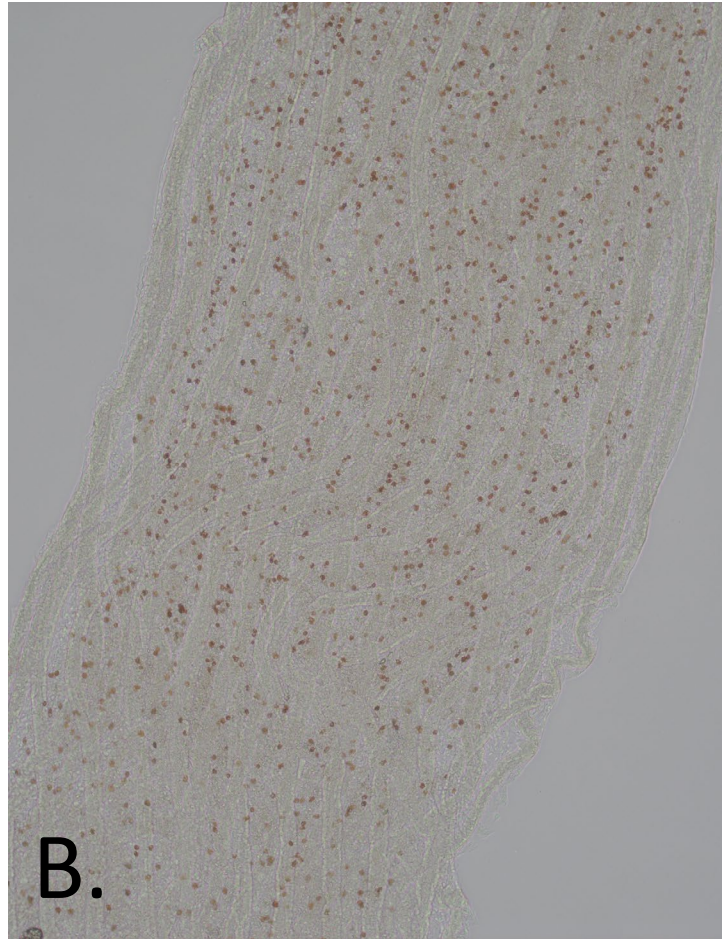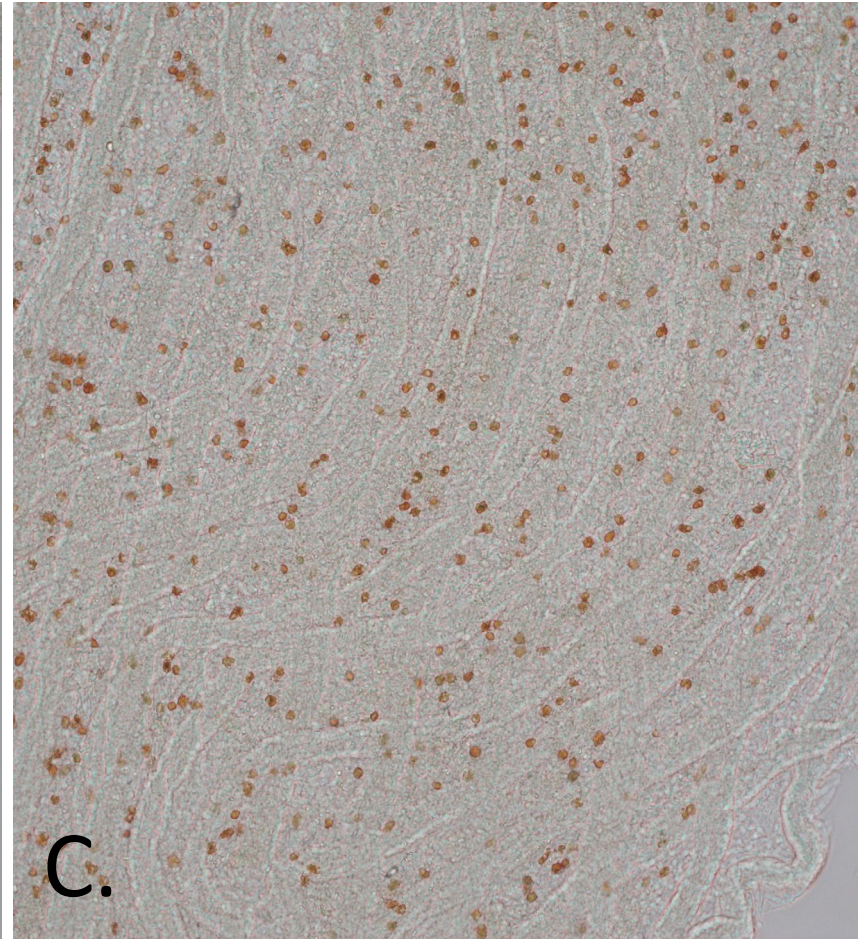

Supplement: 41598_2024_79312_MOESM2_ESM.pdf [file 41598_2024_79312_MOESM2_ESM.pdf]
